# Supplementary material for: Potential of mucoadhesive nanocapsules in drug release and toxicology in zebrafish
Source: PubMed Central journal article supplement (PMC7514080; doi:10.1371/journal.pone.0238823), 2020-09-24
Supplement: pone.0238823.s001.pdf [file pone.0238823.s001.pdf]

## Supplementary information

|         |      |          |         |     |      |              |                               |
|---------|------|----------|---------|-----|------|--------------|-------------------------------|
| HV      | spot | mag      | WD      | det | tilt | HFV          | 3 $\mu$ m<br>CM_UFMG_DualBeam |
| 5.00 kV | 4.5  | 35 000 x | 10.5 mm | ETD | -0 ° | 8.53 $\mu$ m |                               |

**Micrographs of NPMAs. Data** For scanning electron microscopy (SEM),

**Table.** Initial values of mean diameter (nm), polydispersity index (PDI), zeta potential and encapsulation efficiency of nanosuspensions: NP (content benzocaine), NP-control, NPMA (content benzocaine) and NPMA-control (n=5).

| sParticles   | Mean diameter (nm); (PDI)     | Zeta potential (mV) | BENZ encapsulation (%) | Concentration (particles.mL <sup>-1</sup> )       |
|--------------|-------------------------------|---------------------|------------------------|---------------------------------------------------|
| NP           | 249 $\pm$ 2 (0.14 $\pm$ 0.02) | - 25.5 $\pm$ 1.4    | 84.8 $\pm$ 1.2         | 1.1 x 10 <sup>17</sup> $\pm$ 4 x 10 <sup>16</sup> |
| NP-control   | 200 $\pm$ 1 (0.15 $\pm$ 0.03) | -19.5 $\pm$ 0.8     | -                      | 1.4 x 10 <sup>17</sup> $\pm$ 1 x 10 <sup>16</sup> |
| NPMA         | 297 $\pm$ 5 (0.18 $\pm$ 0.01) | +44.3 $\pm$ 0.5     | 72.1 $\pm$ 0.9         | 1.2 x 10 <sup>17</sup> $\pm$ 2 x 10 <sup>16</sup> |
| NPMA-control | 263 $\pm$ 2 (0.19 $\pm$ 0.01) | +46.7 $\pm$ 1.1     | -                      | 1.3 x 10 <sup>17</sup> $\pm$ 1 x 10 <sup>16</sup> |

**Interaction between mucoadhesive nanocapsules and zebrafish.** *In vivo* fluorescence images of zebrafish exposes to NPMAs.

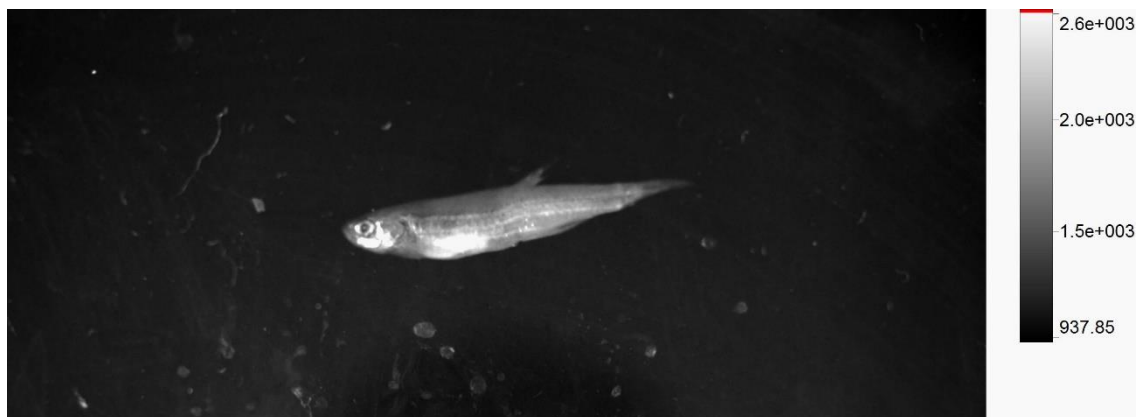

## Supplementary information

---

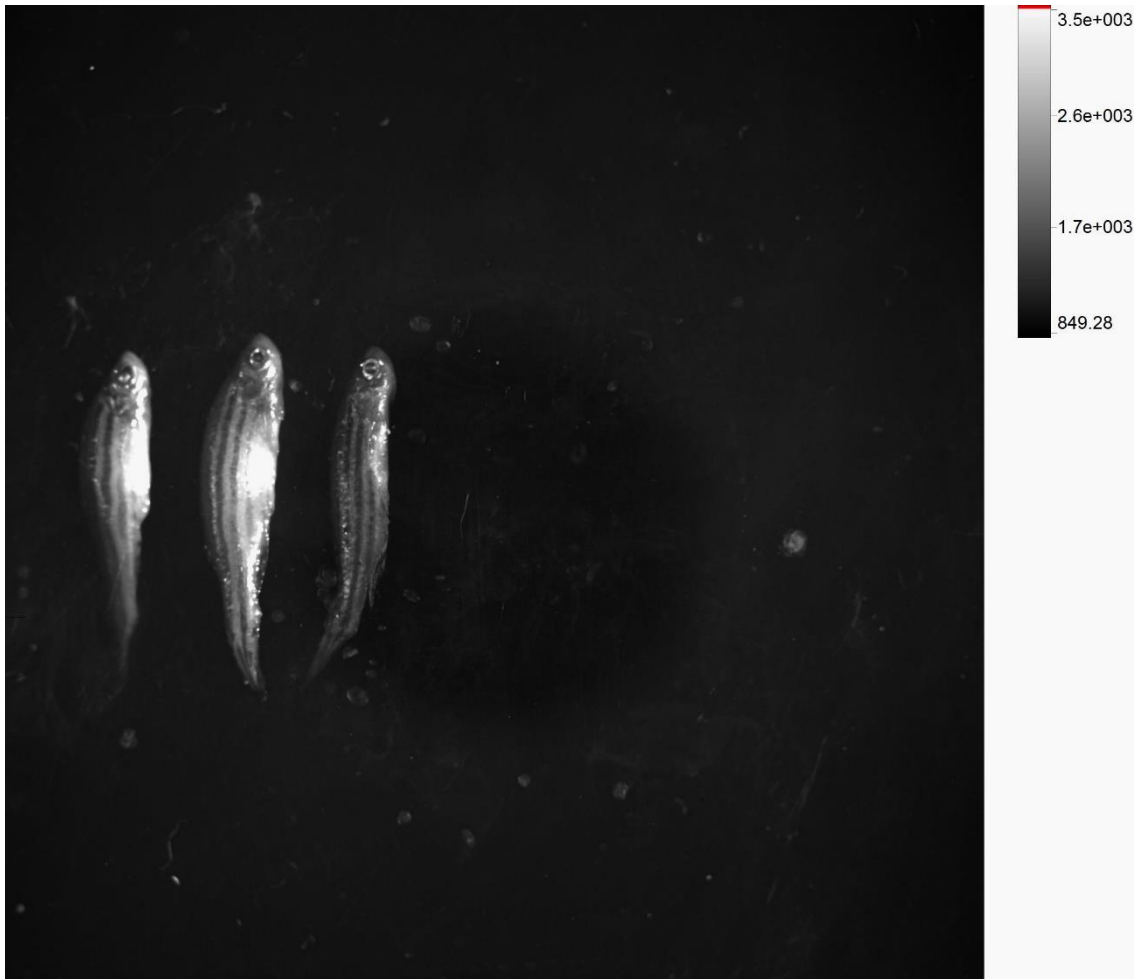

# Supplementary information

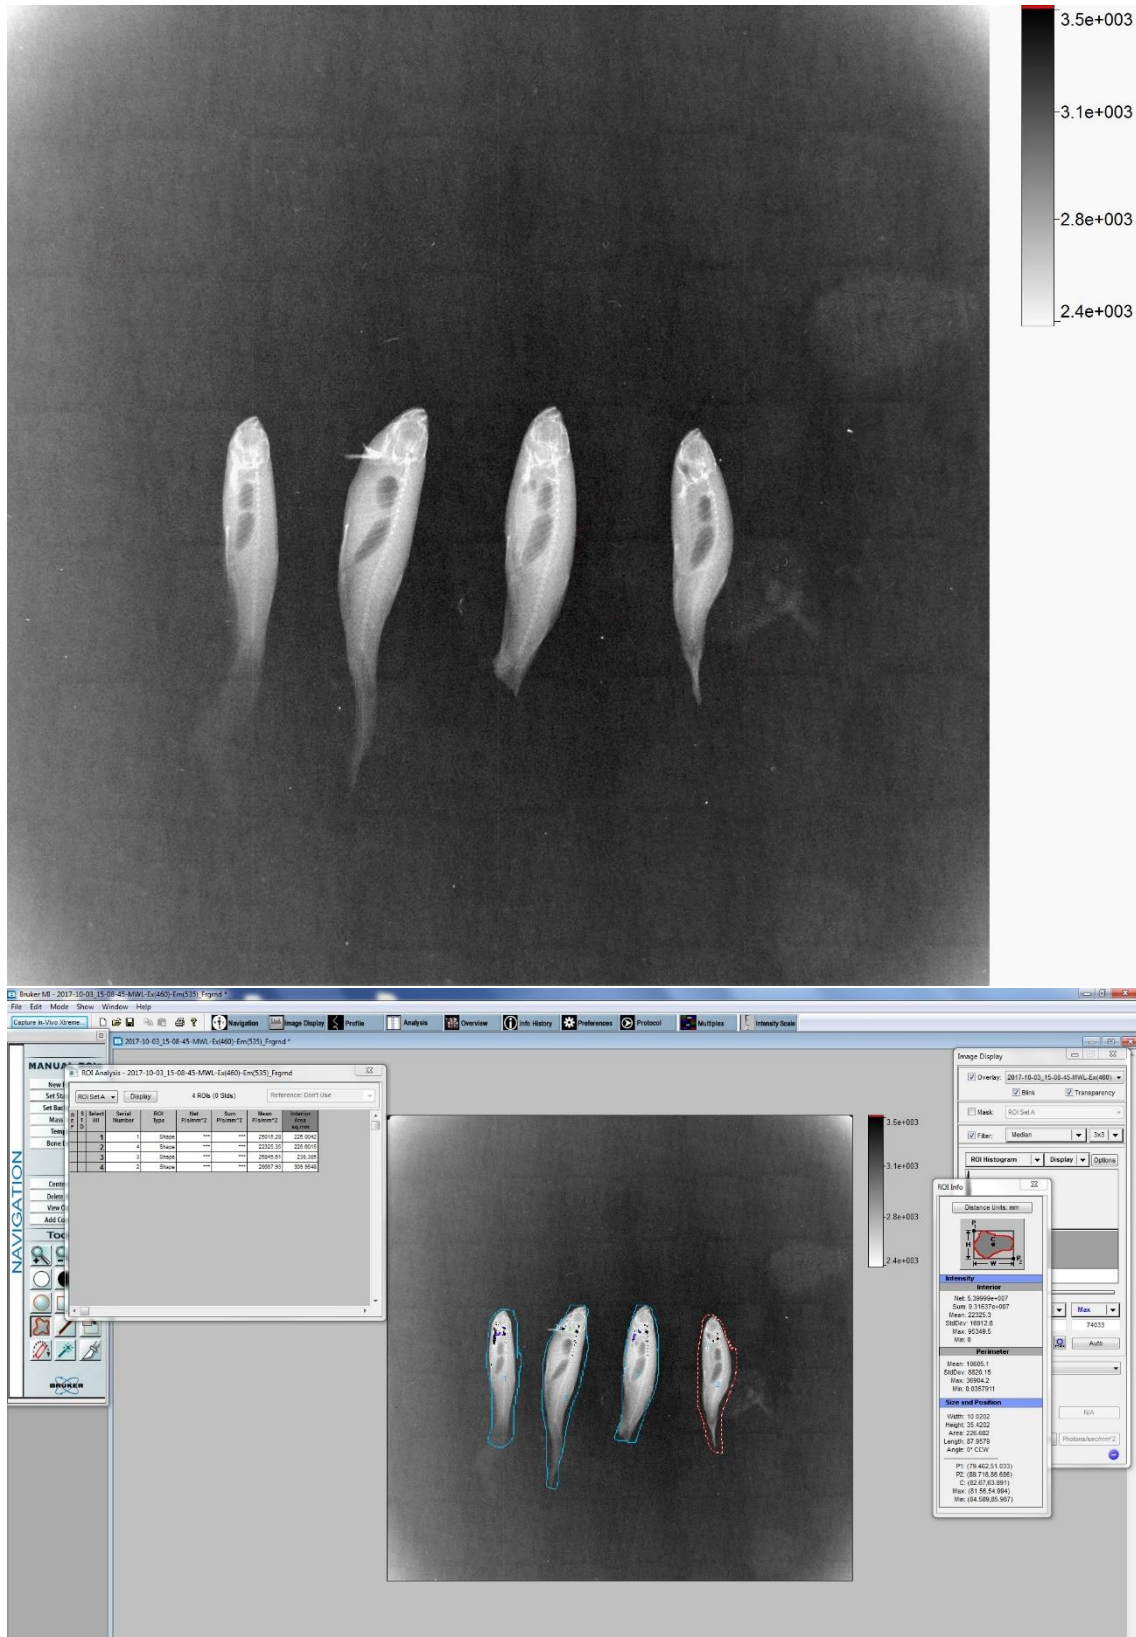

# Supplementary information

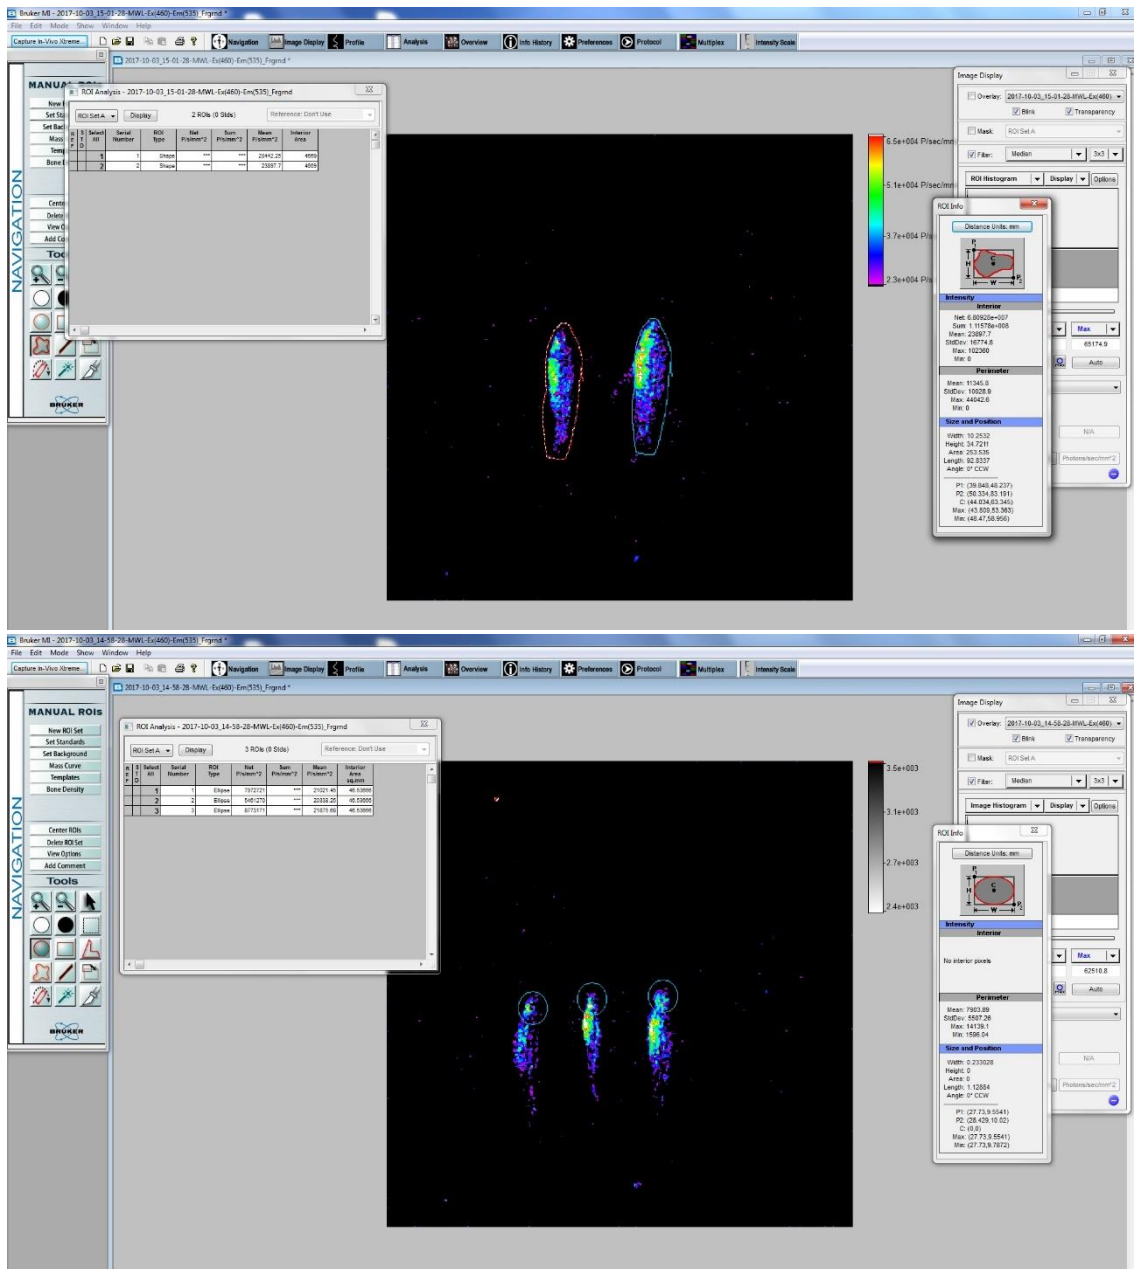

# Supplementary information

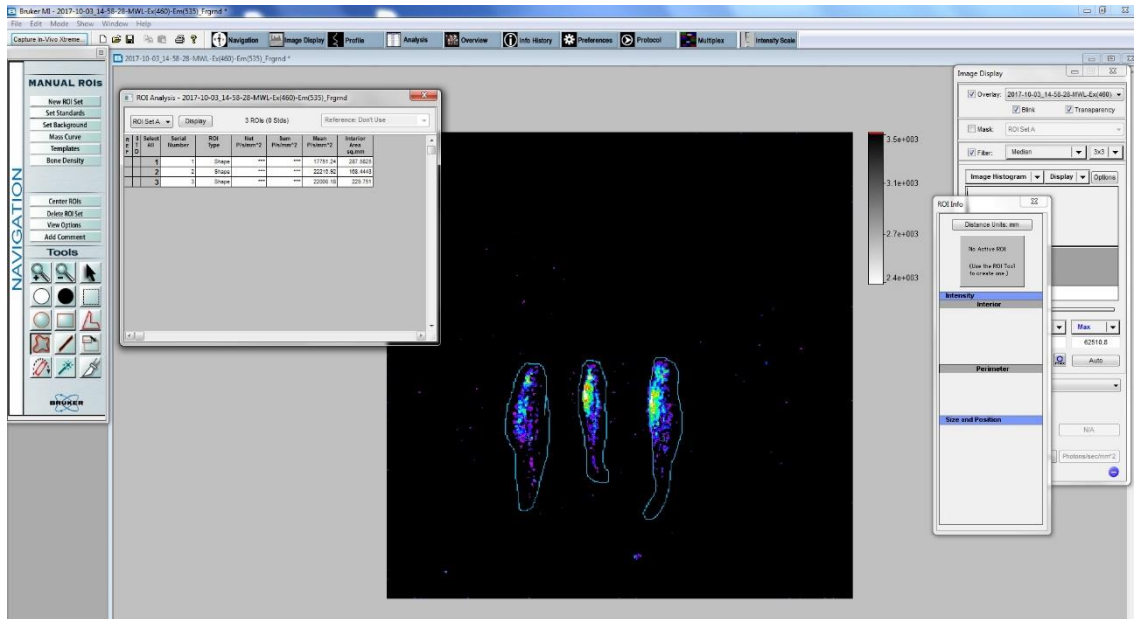

# Supplementary information

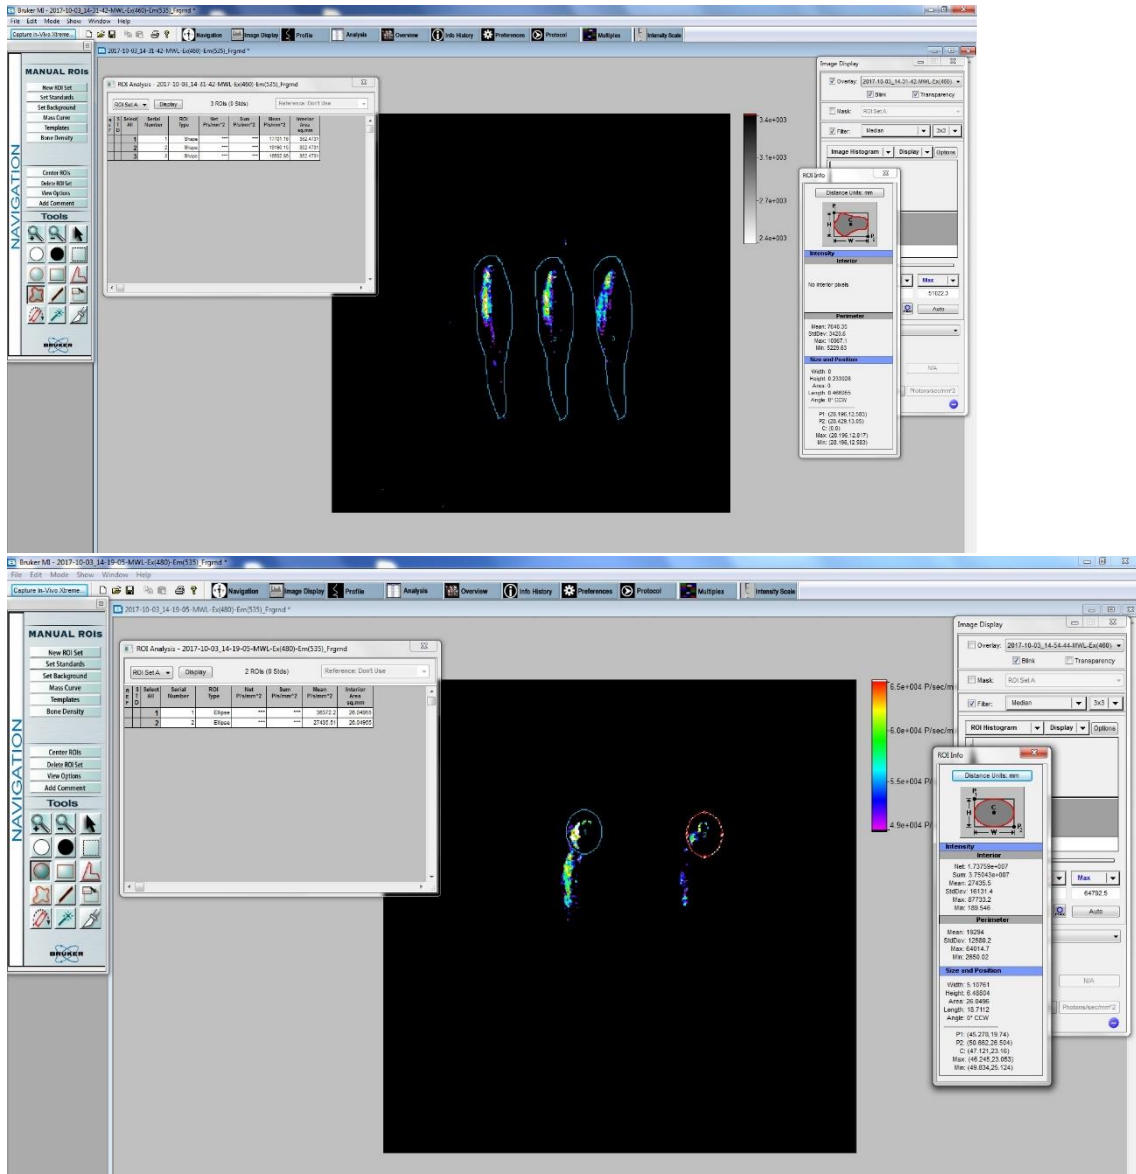

# Supplementary information

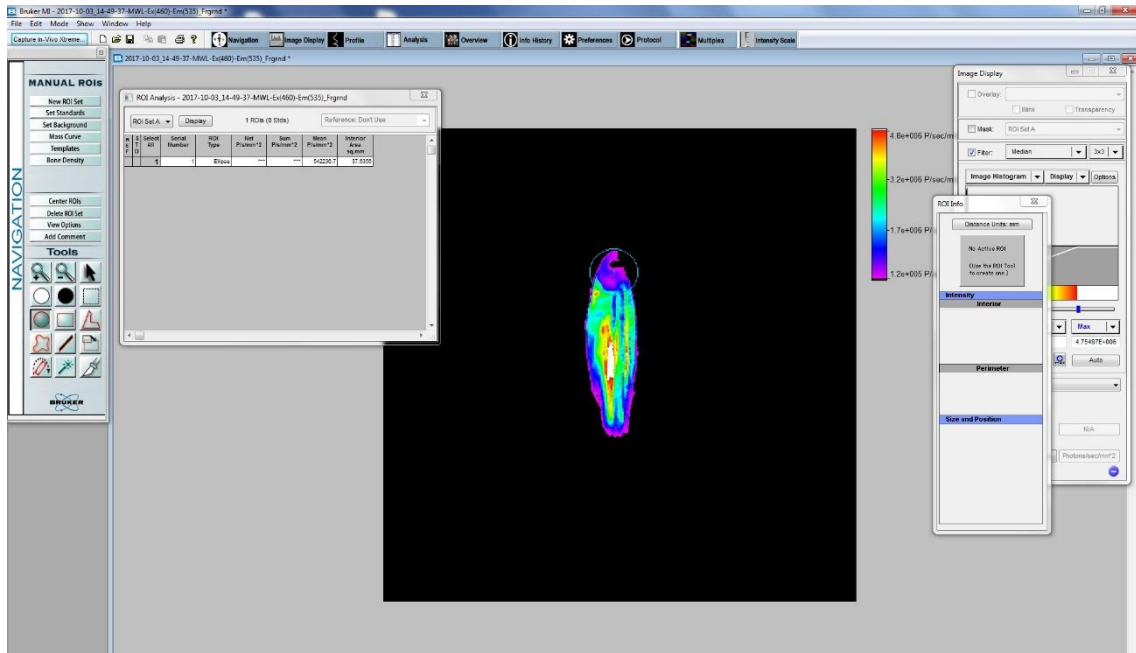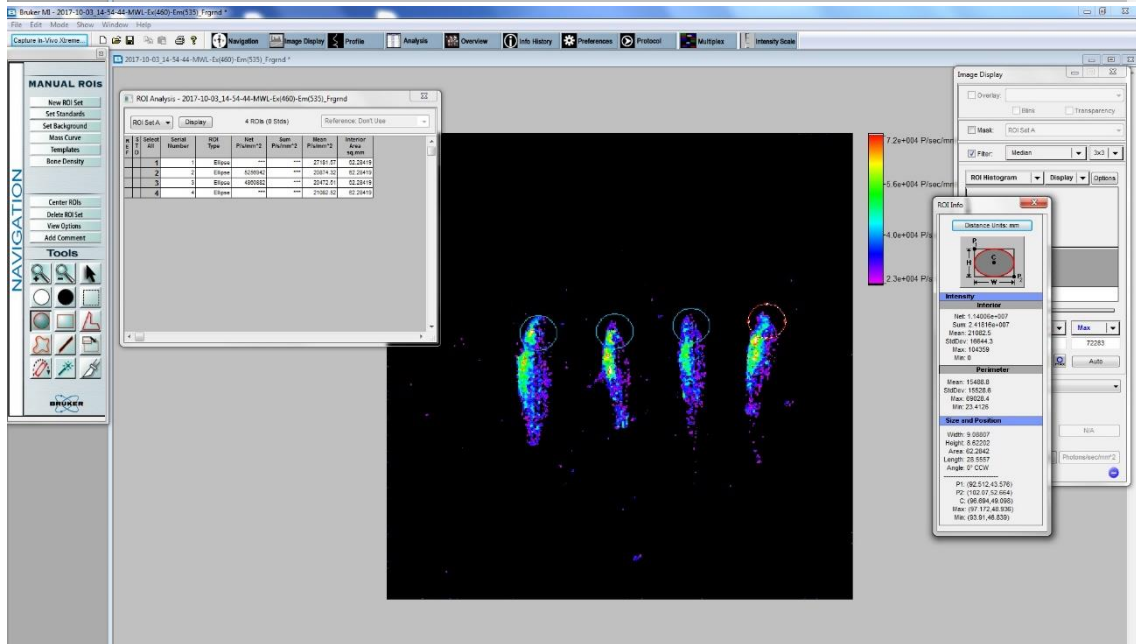

# Supplementary information

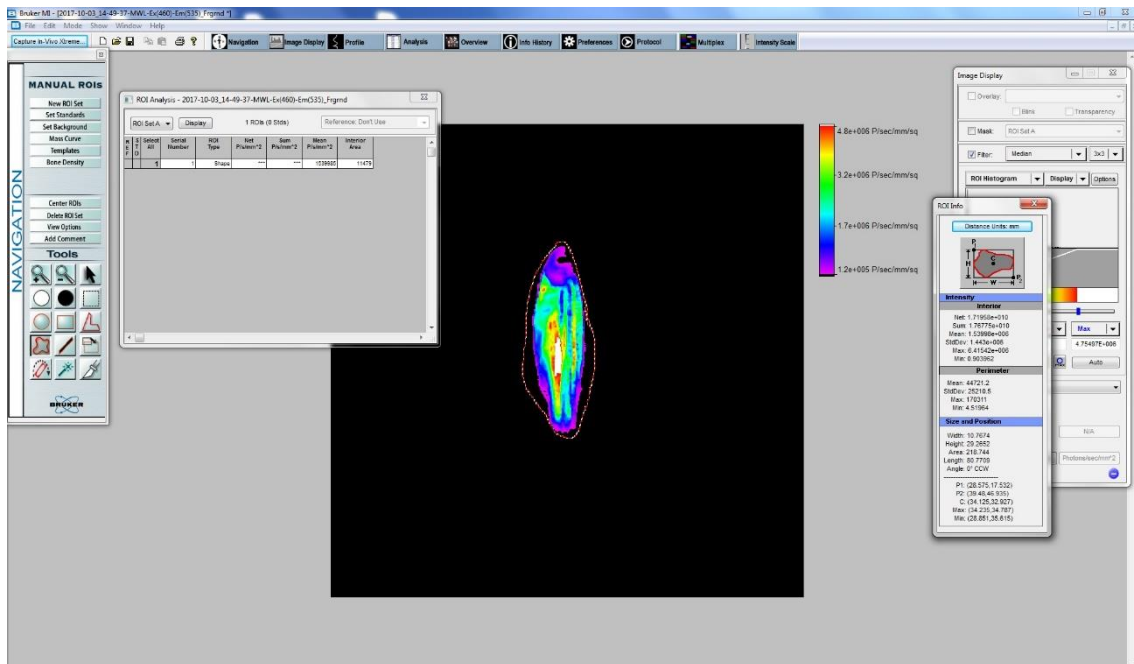



# Supplementary information

## Survival percentage of embryos exposed to free BENZ and encapsulated in nanocapsules.

| Outcomes:           |       | Live =0       | Dead =1 |              |       |              |       |              |       |       |       |       |       |  |
|---------------------|-------|---------------|---------|--------------|-------|--------------|-------|--------------|-------|-------|-------|-------|-------|--|
| <b>Artemisin</b>    |       |               |         |              |       |              |       |              |       |       |       |       |       |  |
| 0.125 ( mg/l )      | Hours | 0.25 ( mg/l ) | Hours   | 0.5 ( mg/l ) | Hours | 1.0 ( mg/l ) | Hours | 1.0 ( mg/l ) | Hours | CT(+) | Hours | CT(-) | Hours |  |
| 0                   | 96    | 0             | 96      | 0            | 96    | 0            | 96    | 0            | 96    | 1     | 24    | 0     | 96    |  |
| 0                   | 96    | 0             | 96      | 0            | 96    | 0            | 96    | 0            | 96    | 1     | 24    | 0     | 96    |  |
| 0                   | 96    | 0             | 96      | 0            | 96    | 0            | 96    | 0            | 96    | 1     | 24    | 0     | 96    |  |
| 0                   | 96    | 0             | 96      | 0            | 96    | 0            | 96    | 0            | 96    | 1     | 24    | 0     | 96    |  |
| 0                   | 96    | 0             | 96      | 0            | 96    | 0            | 96    | 0            | 96    | 1     | 24    | 0     | 96    |  |
| 0                   | 96    | 0             | 96      | 0            | 96    | 0            | 96    | 0            | 96    | 1     | 24    | 0     | 96    |  |
| 0                   | 96    | 0             | 96      | 1            | 24    | 0            | 96    | 0            | 96    | 1     | 24    | 0     | 96    |  |
| 1                   | 24    | 0             | 96      | 0            | 96    | 0            | 96    | 0            | 96    | 1     | 96    | 0     | 96    |  |
| 0                   | 96    | 0             | 96      | 0            | 96    | 0            | 96    | 0            | 96    | 1     | 24    | 0     | 96    |  |
| 0                   | 96    | 0             | 96      | 0            | 96    | 0            | 96    | 0            | 96    | 1     | 24    | 0     | 96    |  |
| 0                   | 96    | 0             | 96      | 0            | 96    | 0            | 96    | 0            | 96    | 1     | 24    | 0     | 96    |  |
| 0                   | 96    | 0             | 96      | 0            | 96    | 0            | 96    | 0            | 96    | 1     | 24    | 0     | 96    |  |
| 0                   | 96    | 0             | 96      | 0            | 96    | 0            | 96    | 0            | 96    | 1     | 24    | 0     | 96    |  |
| 0                   | 96    | 0             | 96      | 0            | 96    | 0            | 96    | 0            | 96    | 1     | 72    | 0     | 96    |  |
| 0                   | 96    | 0             | 96      | 0            | 96    | 0            | 96    | 0            | 96    | 1     | 24    | 0     | 96    |  |
| 0                   | 96    | 0             | 96      | 0            | 96    | 0            | 96    | 0            | 96    | 1     | 24    | 0     | 96    |  |
| 0                   | 96    | 0             | 96      | 0            | 96    | 0            | 96    | 0            | 96    | 1     | 24    | 0     | 96    |  |
| 0                   | 96    | 0             | 96      | 0            | 96    | 0            | 96    | 0            | 96    | 1     | 24    | 0     | 96    |  |
| 0                   | 96    | 0             | 96      | 0            | 96    | 0            | 96    | 0            | 96    | 1     | 24    | 0     | 96    |  |
| 0                   | 96    | 1             | 24      | 0            | 96    | 0            | 96    | 0            | 96    | 1     | 24    | 0     | 96    |  |
| 0                   | 96    | 0             | 96      |              |       | 0            | 96    | 0            | 96    | 1     | 24    | 0     | 96    |  |
| <b>NP</b>           |       |               |         |              |       |              |       |              |       |       |       |       |       |  |
| 0.125 ( mg/l )      | Hours | 0.25 ( mg/l ) | Hours   | 0.5 ( mg/l ) | Hours | 1.0 ( mg/l ) | Hours | 1.0 ( mg/l ) | Hours | CT(+) | Hours | CT(-) | Hours |  |
| 0                   | 96    | 0             | 96      | 0            | 96    | 0            | 96    | 0            | 96    | 1     | 24    | 0     | 96    |  |
| 0                   | 96    | 0             | 96      | 0            | 96    | 0            | 96    | 0            | 96    | 1     | 24    | 0     | 96    |  |
| 0                   | 96    | 0             | 96      | 0            | 96    | 0            | 96    | 0            | 96    | 1     | 24    | 0     | 96    |  |
| 0                   | 96    | 0             | 96      | 0            | 96    | 0            | 96    | 0            | 96    | 1     | 24    | 0     | 96    |  |
| 0                   | 96    | 0             | 96      | 0            | 96    | 0            | 96    | 0            | 96    | 1     | 24    | 0     | 96    |  |
| 0                   | 96    | 0             | 96      | 0            | 96    | 0            | 96    | 0            | 96    | 1     | 24    | 0     | 96    |  |
| 0                   | 96    | 0             | 96      | 0            | 96    | 0            | 96    | 0            | 96    | 1     | 24    | 0     | 96    |  |
| 0                   | 96    | 0             | 96      | 0            | 96    | 0            | 96    | 0            | 96    | 1     | 96    | 0     | 96    |  |
| 0                   | 96    | 0             | 96      | 0            | 96    | 0            | 96    | 0            | 96    | 1     | 24    | 0     | 96    |  |
| 0                   | 96    | 0             | 96      | 0            | 96    | 0            | 96    | 0            | 96    | 1     | 24    | 0     | 96    |  |
| 0                   | 96    | 0             | 96      | 0            | 96    | 0            | 96    | 0            | 96    | 1     | 24    | 0     | 96    |  |
| 0                   | 96    | 0             | 96      | 0            | 96    | 0            | 96    | 0            | 96    | 1     | 24    | 0     | 96    |  |
| 0                   | 96    | 0             | 96      | 0            | 96    | 0            | 96    | 0            | 96    | 1     | 24    | 0     | 96    |  |
| 0                   | 96    | 0             | 96      | 0            | 96    | 1            | 24    | 0            | 96    | 1     | 72    | 0     | 96    |  |
| 0                   | 96    | 0             | 96      | 0            | 96    | 0            | 96    | 0            | 96    | 1     | 24    | 0     | 96    |  |
| 0                   | 96    | 0             | 96      | 0            | 96    | 0            | 96    | 0            | 96    | 1     | 24    | 0     | 96    |  |
| 0                   | 96    | 0             | 96      | 0            | 96    | 0            | 96    | 0            | 96    | 1     | 24    | 0     | 96    |  |
| 0                   | 96    | 0             | 96      | 0            | 96    | 0            | 96    | 0            | 96    | 1     | 24    | 0     | 96    |  |
| 0                   | 96    | 0             | 96      | 0            | 96    | 0            | 96    | 0            | 96    | 1     | 24    | 0     | 96    |  |
| 0                   | 96    | 0             | 96      | 0            | 96    | 0            | 96    | 0            | 96    | 1     | 24    | 0     | 96    |  |
| 0                   | 96    | 0             | 96      | 0            | 96    | 0            | 96    | 0            | 96    | 1     | 24    | 0     | 96    |  |
| 0                   | 96    | 0             | 96      | 0            | 96    | 0            | 96    | 0            | 96    | 1     | 24    | 0     | 96    |  |
| 0                   | 96    | 0             | 96      | 0            | 96    | 0            | 96    | 0            | 96    | 1     | 24    | 0     | 96    |  |
| <b>Artemisin+NP</b> |       |               |         |              |       |              |       |              |       |       |       |       |       |  |
| 0.125 ( mg/l )      | Hours | 0.25 ( mg/l ) | Hours   | 0.5 ( mg/l ) | Hours | 1.0 ( mg/l ) | Hours | 1.0 ( mg/l ) | Hours | CT(+) | Hours | CT(-) | Hours |  |
| 0                   | 96    | 0             | 96      | 0            | 96    | 0            | 96    | 0            | 96    | 1     | 24    | 96    | 0     |  |
| 0                   | 96    | 0             | 96      | 0            | 96    | 0            | 96    | 0            | 96    | 1     | 24    | 96    | 0     |  |
| 0                   | 96    | 0             | 96      | 0            | 96    | 0            | 96    | 0            | 96    | 1     | 24    | 96    | 0     |  |
| 0                   | 96    | 0             | 96      | 0            | 96    | 0            | 96    | 0            | 96    | 1     | 24    | 96    | 0     |  |
| 0                   | 96    | 0             | 96      | 0            | 96    | 0            | 96    | 0            | 96    | 1     | 24    | 96    | 0     |  |
| 0                   | 96    | 0             | 96      | 0            | 96    | 0            | 96    | 0            | 96    | 1     | 24    | 96    | 0     |  |
| 0                   | 96    | 0             | 96      | 0            | 96    | 0            | 96    | 0            | 96    | 1     | 24    | 96    | 0     |  |
| 1                   | 24    | 0             | 96      | 0            | 96    | 0            | 96    | 0            | 96    | 1     | 96    | 96    | 0     |  |
| 0                   | 96    | 0             | 96      | 0            | 96    | 0            | 96    | 0            | 96    | 1     | 24    | 96    | 0     |  |
| 0                   | 96    | 0             | 96      | 0            | 96    | 0            | 96    | 0            | 96    | 1     | 24    | 96    | 0     |  |
| 0                   | 96    | 0             | 96      | 0            | 96    | 0            | 96    | 0            | 96    | 1     | 24    | 96    | 0     |  |
| 0                   | 96    | 0             | 96      | 0            | 96    | 0            | 96    | 0            | 96    | 1     | 24    | 96    | 0     |  |
| 0                   | 96    | 0             | 96      | 0            | 96    | 0            | 96    | 0            | 96    | 1     | 72    | 96    | 0     |  |
| 0                   | 96    | 0             | 96      | 0            | 96    | 0            | 96    | 0            | 96    | 1     | 24    | 96    | 0     |  |
| 0                   | 96    | 0             | 96      | 0            | 96    | 1            | 24    | 0            | 96    | 1     | 24    | 96    | 0     |  |
| 0                   | 96    | 0             | 96      | 0            | 96    | 0            | 96    | 0            | 96    | 1     | 24    | 96    | 0     |  |
| 0                   | 96    | 0             | 96      | 0            | 96    | 0            | 96    | 0            | 96    | 1     | 24    | 96    | 0     |  |
| 0                   | 96    | 0             | 96      | 0            | 96    | 1            | 24    | 0            | 96    | 1     | 24    | 96    | 0     |  |
| 0                   | 96    | 0             | 96      | 0            | 96    | 0            | 96    | 0            | 96    | 1     | 24    | 96    | 0     |  |
| 0                   | 96    | 0             | 96      | 0            | 96    | 0            | 96    | 0            | 96    | 1     | 24    | 96    | 0     |  |
| 0                   | 96    | 0             | 96      | 0            | 96    | 0            | 96    | 0            | 96    | 1     | 24    | 96    | 0     |  |
| 0                   | 96    | 0             | 96      | 0            | 96    | 0            | 96    | 0            | 96    | 1     | 24    | 96    | 0     |  |
| 0                   | 96    | 0             | 96      | 0            | 96    | 0            | 96    | 0            | 96    | 1     | 24    | 96    | 0     |  |
